# Supplementary material for: Achievement of LDL-C Targets Defined by ESC/EAS (2011) Guidelines in Risk-Stratified Korean Patients with Dyslipidemia Receiving Lipid-Modifying Treatments
Source: PubMed Central journal article supplement — Endocrinol Metab (Seoul). 2020 Jun 30;35(2):367–76. doi: 10.3803/EnM.2020.35.2.367 (PMC7386099; doi:10.3803/enm.2020.35.2.367), 2020-06-30
Supplement: enm-2020-35-2-367-Suppl.pdf [file enm-2020-35-2-367-Suppl.pdf]

**Supplemental Table S1.** Preconditions for Risk Stratification According to ESC/EAS Guidelines (2011)

| Risk level | Preconditions                                                                                                                                                                                                                                                                                                                                                                                                                                                                                                                                                                                                                     |
|------------|-----------------------------------------------------------------------------------------------------------------------------------------------------------------------------------------------------------------------------------------------------------------------------------------------------------------------------------------------------------------------------------------------------------------------------------------------------------------------------------------------------------------------------------------------------------------------------------------------------------------------------------|
| Low        | Individuals with SCORE value <sup>a</sup> <1%                                                                                                                                                                                                                                                                                                                                                                                                                                                                                                                                                                                     |
| Moderate   | Individuals with SCORE value ≥1% and <5%                                                                                                                                                                                                                                                                                                                                                                                                                                                                                                                                                                                          |
| High-risk  | Individuals with <ul style="list-style-type: none"> <li>• Markedly elevated single risk factors such as familial dyslipidemias and severe hypertension (SBP ≥180 mm Hg and/or DBP ≥110 mm Hg)</li> <li>• SCORE value ≥5% and &lt;10%</li> </ul>                                                                                                                                                                                                                                                                                                                                                                                   |
| Very high  | Individuals with <ul style="list-style-type: none"> <li>• Documented CVD by invasive or non-invasive testing (such as coronary angiography, nuclear imaging, stress echocardiography carotid plaque on ultrasound), previous MI, ACS, coronary revascularization (PCI, CABG) and other arterial revascularization procedures, ischaemic stroke, PAD</li> <li>• Patients with type 2 diabetes, patients with type 1 diabetes with target organ damage (such as microalbuminuria or retinopathy)</li> <li>• Patients with moderate to severe CKD (GFR &lt;60 mL/min/1.73 m<sup>2</sup>)</li> <li>• With SCORE value ≥10%</li> </ul> |

ESC, European Society of Cardiology; EAS, European Atherosclerosis Society; SCORE, Systematic COronary Risk Evaluation; SBP, systolic blood pressure; DBP, diastolic blood pressure; CVD, cardiovascular disorder; MI, myocardial infarction; ACS, acute coronary syndrome; PCI, percutaneous intervention; CABG, coronary artery bypass graft; PAD, peripheral arterial disease; CKD, chronic kidney disease; GFR, glomerular filtration rate.

<sup>a</sup>The SCORE algorithm assesses 10-year risk of fatal cardiovascular disease, based on sex, age, smoking status, systolic blood pressure, and total serum cholesterol. In this study, pre-treatment total serum cholesterol values were used.

**Supplemental Table S2.** List of Study Investigators in Korea

| Name of the investigator | Affiliation                                                                                                                                                                                  |
|--------------------------|----------------------------------------------------------------------------------------------------------------------------------------------------------------------------------------------|
| Sung-Il Sohn             | Department of Neurology, Keimyung University Dongsan Medical Center, Daegu, Korea                                                                                                            |
| Sung-Hee Choi            | Department of Internal Medicine, Seoul National University College of Medicine, Seoul, Korea<br>Department of Internal Medicine, Seoul National University Bundang Hospital, Seongnam, Korea |
| Yong-Jin Kim             | Department of Internal Medicine, Seoul National University Hospital, Seoul, Korea                                                                                                            |
| Seung-Jin Oh             | Division of Cardiology, Department of Internal Medicine, National Health Insurance Service Ilsan Hospital, Goyang, Korea                                                                     |
| Jin-Ho Shin              | Division of Cardiology, Department of Internal Medicine, Hanyang University Seoul Hospital, Seoul, Korea                                                                                     |
| Bo-Hyun Kim              | Department of Internal Medicine, Pusan National University Hospital, Busan, Korea                                                                                                            |
| Woo-Keun Seo             | Department of Neurology, Samsung Medical Center, Sungkyunkwan University School of Medicine, Seoul, Korea                                                                                    |
| Jae-Kwan Cha             | Busan-Ulsan Regional Cardiocerebrovascular Center, Dong-A University Hospital, Busan, Korea<br>Department of Neurology, Dong-A University College of Medicine, Busan, Korea                  |
| Kyoung-Im Cho            | Division of Cardiology, Department of Internal Medicine, Kosin University College of Medicine, Busan, Korea                                                                                  |
| Hye-Soon Kim             | Department of Internal Medicine, Keimyung University School of Medicine, Daegu, Korea                                                                                                        |
| Jin-Won Kim              | Department of Cardiology, Korea University Guro Hospital, Seoul, Korea                                                                                                                       |
| Sang-Chol Lee            | Division of Cardiology, Department of Medicine, Samsung Medical Center, Sungkyunkwan University School of Medicine, Seoul, Korea                                                             |
| Shin-Jae Kim             | Department of Internal Medicine, Ulsan University Hospital, University of Ulsan College of Medicine, Ulsan, Korea                                                                            |
| Sang Yong Kim            | Division of Endocrinology and Metabolism, Department of Internal Medicine, Chosun University College of Medicine, Gwangju, Korea                                                             |
| Jung-Rae Cho             | Cardiovascular Division, Department of Internal Medicine, Hallym University Kangnam Sacred Heart Hospital, Seoul, Korea                                                                      |
| Jung-Sun Kim             | Division of Cardiology, Severance Cardiovascular Hospital, Yonsei University College of Medicine, Seoul, Korea                                                                               |
| Kyung Mook Choi          | Division of Endocrinology and Metabolism, Department of Internal Medicine, Korea University Guro Hospital, Seoul, Korea                                                                      |
| Soon Hee Lee             | Division of Endocrinology and Metabolism, Department of Internal Medicine, Inje University Busan Paik Hospital, Inje University College of Medicine, Busan, Korea.                           |
| Kang Wook Lee            | Division of Nephrology, Department of Internal Medicine, Chungnam National University Hospital, Chungnam National University College of Medicine, Daejeon, Korea                             |
